# Supplementary material for: Oxylipins Associated with D3-Creatine Muscle Mass/Weight and Physical Performance among Community-Dwelling Older Men
Source: MDPI journal article supplement (doi:10.3390/ijms232112857), 2022-10-25
Supplement: s1 [file s1]

## Supplementary Information

Manuscript title: Oxylipins associated with D3-creatine muscle mass/weight and physical performance among community-dwelling older men

Figure S1. Flowchart from N=5994 men originally enrolled in MrOS to the analytic sample of n=463 men in the current report

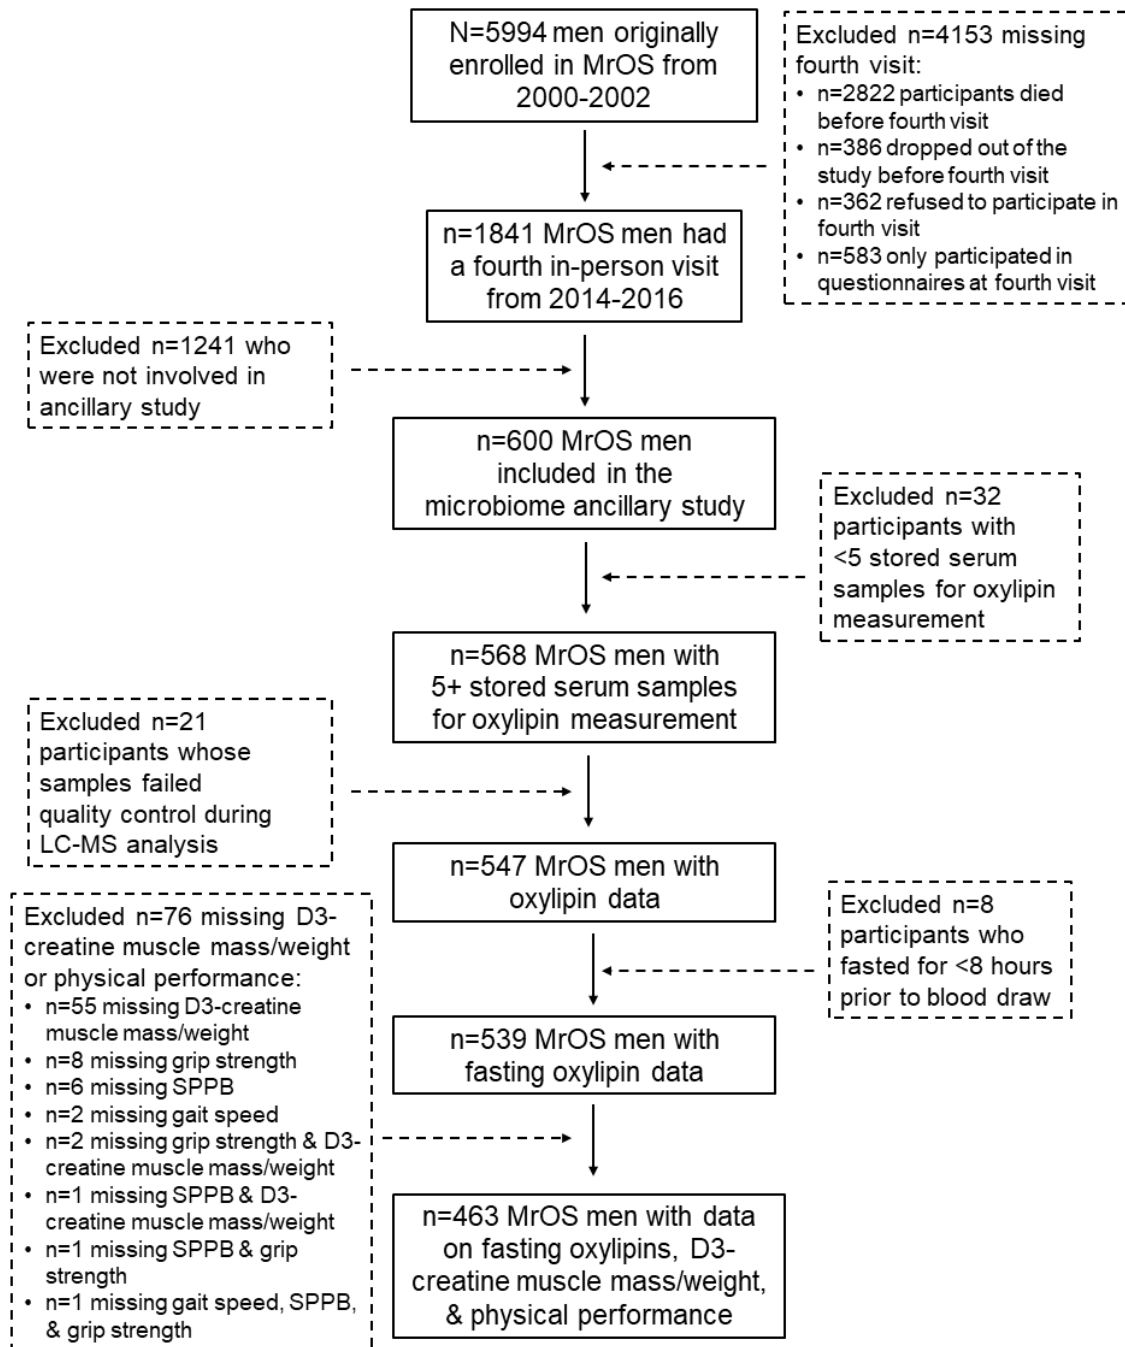

Table S1. Adjusted standardized beta coefficients between oxylipins and physical performance and D3-creatine muscle mass/weight, organized by fatty acid classification and most significant association with gait speed among 463 MrOs Men

| Oxylipin:           | Standardized beta coefficient (standard error), p-value, false discovery rate |                                 |                                   |                                    |
|---------------------|-------------------------------------------------------------------------------|---------------------------------|-----------------------------------|------------------------------------|
|                     | D3-creatine Muscle Mass/weight                                                | Gait Speed                      | Grip Strength                     | Short Physical Performance Battery |
| Fatty acid alcohol: |                                                                               |                                 |                                   |                                    |
| 14-HDoHE            | 0.14 (0.04), p=0.002, FDR=0.03                                                | 0.14 (0.04), p=0.002, FDR=0.03  | 0.02 (0.04), p=0.69, FDR=0.997    | 0.08 (0.04), p=0.06, FDR=0.23      |
| 4-HDoHE             | 0.13 (0.04), p=0.003, FDR=0.03                                                | 0.14 (0.04), p=0.001, FDR=0.03  | 0.03 (0.04), p=0.49, FDR=0.997    | 0.08 (0.04), p=0.08, FDR=0.27      |
| 12S-HEPE            | 0.10 (0.04), p=0.03, FDR=0.07                                                 | 0.11 (0.04), p=0.01, FDR=0.06   | -0.006 (0.04), p=0.9, FDR=0.997   | 0.05 (0.04), p=0.23, FDR=0.37      |
| 15-HETE             | 0.07 (0.04), p=0.11, FDR=0.18                                                 | 0.13 (0.04), p=0.003, FDR=0.04  | 0.04 (0.04), p=0.37, FDR=0.997    | 0.07 (0.04), p=0.11, FDR=0.28      |
| 8S-HETE             | 0.09 (0.04), p=0.04, FDR=0.10                                                 | 0.12 (0.04), p=0.005, FDR=0.05  | 0.01 (0.04), p=0.82, FDR=0.997    | 0.09 (0.04), p=0.04, FDR=0.16      |
| 11-HETE             | 0.10 (0.04), p=0.02, FDR=0.07                                                 | 0.11 (0.04), p=0.009, FDR=0.05  | 0.001 (0.04), p=0.98, FDR=0.997   | 0.07 (0.04), p=0.10, FDR=0.27      |
| 9-HETE              | 0.09 (0.04), p=0.04, FDR=0.10                                                 | 0.10 (0.04), p=0.02, FDR=0.06   | 0.02 (0.04), p=0.57, FDR=0.997    | 0.09 (0.04), p=0.04, FDR=0.16      |
| 9-HEPE              | 0.12 (0.04), p=0.005, FDR=0.03                                                | 0.09 (0.04), p=0.04, FDR=0.10   | 0.03 (0.04), p=0.56, FDR=0.997    | 0.03 (0.04), p=0.54, FDR=0.64      |
| 15-HEPE             | 0.12 (0.04), p=0.008, FDR=0.04                                                | 0.08 (0.04), p=0.05, FDR=0.11   | -0.01 (0.04), p=0.74, FDR=0.997   | 0.03 (0.04), p=0.43, FDR=0.58      |
| 9-HODE              | 0.10 (0.04), p=0.02, FDR=0.07                                                 | 0.08 (0.04), p=0.07, FDR=0.13   | -0.02 (0.04), p=0.73, FDR=0.997   | 0.10 (0.04), p=0.02, FDR=0.13      |
| 5-HETE              | 0.07 (0.04), p=0.11, FDR=0.18                                                 | 0.09 (0.04), p=0.03, FDR=0.08   | 0.02 (0.04), p=0.71, FDR=0.997    | 0.04 (0.04), p=0.34, FDR=0.47      |
| 12S-HETE            | 0.04 (0.04), p=0.39, FDR=0.46                                                 | 0.07 (0.04), p=0.10, FDR=0.19   | -0.006 (0.04), p=0.89, FDR=0.997  | 0.07 (0.04), p=0.10, FDR=0.27      |
| 13-HOTE             | 0.12 (0.04), p=0.006, FDR=0.03                                                | 0.08 (0.04), p=0.05, FDR=0.11   | -0.0007 (0.04), p=0.99, FDR=0.997 | 0.14 (0.04), p=0.001, FDR=0.03     |
| 13S-HODE            | 0.12 (0.04), p=0.006, FDR=0.03                                                | 0.07 (0.04), p=0.10, FDR=0.18   | 0.04 (0.04), p=0.36, FDR=0.997    | 0.12 (0.04), p=0.007, FDR=0.10     |
| 17-HDoHE            | 0.09 (0.04), p=0.04, FDR=0.10                                                 | 0.04 (0.04), p=0.31, FDR=0.41   | 0.02 (0.04), p=0.68, FDR=0.997    | 0.03 (0.04), p=0.54, FDR=0.64      |
| 9-HOTE              | 0.05 (0.04), p=0.22, FDR=0.28                                                 | 0.02 (0.04), p=0.57, FDR=0.66   | -0.02 (0.04), p=0.64, FDR=0.997   | 0.06 (0.04), p=0.19, FDR=0.34      |
| Fatty acid diol:    |                                                                               |                                 |                                   |                                    |
| 5,6-DiHETrE         | 0.10 (0.04), p=0.03, FDR=0.07                                                 | 0.12 (0.04), p=0.004, FDR=0.04  | 0.02 (0.04), p=0.7, FDR=0.997     | 0.05 (0.04), p=0.23, FDR=0.37      |
| 6-trans-LTB4        | 0.07 (0.04), p=0.10, FDR=0.18                                                 | 0.11 (0.04), p=0.01, FDR=0.06   | -0.02 (0.04), p=0.61, FDR=0.997   | 0.06 (0.04), p=0.15, FDR=0.31      |
| 14,15-DiHETrE       | -0.06 (0.04), p=0.17, FDR=0.23                                                | -0.10 (0.04), p=0.02, FDR=0.07  | 0.04 (0.04), p=0.35, FDR=0.997    | -0.05 (0.04), p=0.26, FDR=0.40     |
| 12,13-DiHOME        | -0.002 (0.04), p=0.97, FDR=0.97                                               | -0.09 (0.04), p=0.03, FDR=0.08  | 0.001 (0.04), p=0.97, FDR=0.997   | -0.06 (0.04), p=0.14, FDR=0.30     |
| 15,16-DiHODE        | -0.08 (0.04), p=0.06, FDR=0.12                                                | -0.08 (0.04), p=0.05, FDR=0.11  | 0.02 (0.04), p=0.61, FDR=0.997    | 0.004 (0.04), p=0.93, FDR=0.94     |
| 9,10-DiHOME         | 0.06 (0.04), p=0.16, FDR=0.23                                                 | -0.09 (0.04), p=0.03, FDR=0.08  | -0.02 (0.04), p=0.67, FDR=0.997   | 0.03 (0.04), p=0.52, FDR=0.64      |
| 11,12-DiHETrE       | -0.03 (0.04), p=0.45, FDR=0.49                                                | -0.06 (0.04), p=0.17, FDR=0.27  | 0.02 (0.04), p=0.7, FDR=0.997     | 0.003 (0.04), p=0.94, FDR=0.94     |
| 17,18-DiHETE        | 0.07 (0.05), p=0.13, FDR=0.19                                                 | 0.02 (0.05), p=0.64, FDR=0.71   | -0.02 (0.05), p=0.69, FDR=0.997   | -0.01 (0.05), p=0.81, FDR=0.85     |
| 9,10-e-DiHO         | 0.03 (0.04), p=0.55, FDR=0.59                                                 | -0.05 (0.04), p=0.26, FDR=0.36  | 0.0001 (0.04), p=0.997, FDR=0.997 | -0.03 (0.04), p=0.52, FDR=0.64     |
| 8,9-DiHETrE         | -0.02 (0.04), p=0.62, FDR=0.65                                                | -0.03 (0.04), p=0.52, FDR=0.64  | 0.003 (0.04), p=0.95, FDR=0.997   | -0.04 (0.04), p=0.32, FDR=0.46     |
| 19,20-DiHDPE        | 0.16 (0.05), p=0.0005, FDR=0.02                                               | 0.01 (0.04), p=0.78, FDR=0.82   | 0.03 (0.04), p=0.48, FDR=0.997    | 0.06 (0.05), p=0.18, FDR=0.34      |
| 14,15-DiHETE        | 0.08 (0.05), p=0.10, FDR=0.18                                                 | -0.06 (0.05), p=0.23, FDR=0.34  | 0.002 (0.05), p=0.97, FDR=0.997   | 0.03 (0.05), p=0.55, FDR=0.64      |
| 9,10-DiHODE         | -0.04 (0.04), p=0.41, FDR=0.46                                                | 0.02 (0.04), p=0.67, FDR=0.72   | -0.07 (0.04), p=0.12, FDR=0.997   | -0.01 (0.04), p=0.78, FDR=0.84     |
| Fatty acid epoxide: |                                                                               |                                 |                                   |                                    |
| 9(10)-EpOME         | 0.08 (0.04), p=0.07, FDR=0.15                                                 | 0.06 (0.04), p=0.13, FDR=0.22   | -0.01 (0.04), p=0.78, FDR=0.997   | 0.10 (0.04), p=0.02, FDR=0.13      |
| 15,16-EpODE         | 0.06 (0.04), p=0.17, FDR=0.23                                                 | -0.07 (0.04), p=0.11, FDR=0.19  | -0.04 (0.04), p=0.4, FDR=0.997    | -0.02 (0.04), p=0.59, FDR=0.67     |
| 11,12-EpETrE        | 0.07 (0.04), p=0.10, FDR=0.18                                                 | 0.05 (0.04), p=0.24, FDR=0.34   | 0.02 (0.04), p=0.64, FDR=0.997    | 0.05 (0.04), p=0.28, FDR=0.42      |
| 14,15-EpETrE        | 0.07 (0.04), p=0.11, FDR=0.18                                                 | 0.03 (0.04), p=0.47, FDR=0.60   | -0.01 (0.04), p=0.79, FDR=0.997   | 0.06 (0.04), p=0.16, FDR=0.32      |
| alpha-9(10)-EpODE   | 0.05 (0.04), p=0.23, FDR=0.28                                                 | 0.03 (0.04), p=0.55, FDR=0.66   | -0.01 (0.04), p=0.81, FDR=0.997   | 0.06 (0.04), p=0.20, FDR=0.36      |
| 12(13)-EpOME        | 0.07 (0.04), p=0.12, FDR=0.18                                                 | 0.02 (0.04), p=0.60, FDR=0.68   | -0.05 (0.04), p=0.22, FDR=0.997   | 0.10 (0.04), p=0.02, FDR=0.13      |
| alpha-12(13)-EpODE  | 0.10 (0.04), p=0.02, FDR=0.07                                                 | 0.0005 (0.04), p=0.99, FDR=0.99 | -0.007 (0.04), p=0.87, FDR=0.997  | 0.09 (0.04), p=0.03, FDR=0.15      |
| 9,10-EpO            | 0.01 (0.04), p=0.73, FDR=0.75                                                 | -0.008 (0.04), p=0.85, FDR=0.87 | -0.03 (0.04), p=0.53, FDR=0.997   | -0.02 (0.04), p=0.66, FDR=0.73     |
| Fatty acid ketone:  |                                                                               |                                 |                                   |                                    |
| 5-KETE              | 0.10 (0.04), p=0.02, FDR=0.07                                                 | 0.12 (0.04), p=0.007, FDR=0.05  | -0.004 (0.04), p=0.94, FDR=0.997  | 0.08 (0.04), p=0.08, FDR=0.27      |
| 9-KODE              | 0.13 (0.04), p=0.003, FDR=0.03                                                | 0.10 (0.04), p=0.02, FDR=0.06   | -0.04 (0.04), p=0.33, FDR=0.997   | 0.14 (0.04), p=0.001, FDR=0.03     |
| 13-KODE             | 0.10 (0.04), p=0.02, FDR=0.07                                                 | 0.09 (0.04), p=0.03, FDR=0.08   | -0.01 (0.04), p=0.81, FDR=0.997   | 0.10 (0.04), p=0.02, FDR=0.14      |
| Fatty acid triol:   |                                                                               |                                 |                                   |                                    |
| 9,12,13-TriHOME     | 0.06 (0.04), p=0.17, FDR=0.23                                                 | 0.05 (0.04), p=0.24, FDR=0.34   | 0.03 (0.04), p=0.55, FDR=0.997    | 0.07 (0.04), p=0.09, FDR=0.27      |
| Nitro-fatty acid:   |                                                                               |                                 |                                   |                                    |
| 10-Nitrooleate      | -0.05 (0.04), p=0.27, FDR=0.33                                                | -0.05 (0.04), p=0.21, FDR=0.32  | 0.009 (0.04), p=0.84, FDR=0.997   | -0.07 (0.04), p=0.12, FDR=0.28     |

Models were adjusted for age, more than high school education, Physical Activity Scale for the Elderly, western style dietary pattern score, and fish oil supplement use.

Gray shaded cells: associations with p<0.05 & FDR≤10%.

Table S2. Fatty acid classification, abbreviation, and full name of the 42 oxylipins included in this report

| Fatty acid classification: | Polyunsaturated fatty acid type oxylipin is derived from: | Oxylipin abbreviation | Oxylipin                                           | Number (%) of participants oxylipin was detected in |
|----------------------------|-----------------------------------------------------------|-----------------------|----------------------------------------------------|-----------------------------------------------------|
| Fatty acid alcohol         | Omega-3                                                   | 14-HDoHE              | 14-hydroxydocosa-4,7,10,12,16,19-hexaenoic acid    | 442 (95%)                                           |
| Fatty acid alcohol         | Omega-3                                                   | 4-HDoHE               | 4-hydroxydocosa-5,7,10,13,16,19-hexaenoic acid     | 452 (98%)                                           |
| Fatty acid alcohol         | Omega-3                                                   | 12S-HEPE              | 12-Hydroxy-5,8,10,14,17-eicosapentaenoic acid      | 457 (99%)                                           |
| Fatty acid alcohol         | Omega-6                                                   | 15-HETE               | 15-hydroxyeicosa-5,8,11,13-tetraenoic acid         | 460 (99%)                                           |
| Fatty acid alcohol         | Omega-6                                                   | 8S-HETE               | 8-hydroxyeicosa-5,9,11,14-tetraenoic acid          | 418 (90%)                                           |
| Fatty acid alcohol         | Omega-6                                                   | 11-HETE               | 11-Hydroxy-arachidonic acid                        | 461 (100%)                                          |
| Fatty acid alcohol         | Omega-6                                                   | 9-HETE                | 9-hydroxyeicosa-5,7,11,14-tetraenoic acid          | 436 (94%)                                           |
| Fatty acid alcohol         | Omega-6                                                   | 9-HEPE                | 9-Hydroxy-5,7,11,14,17-icosapentaenoic acid        | 455 (98%)                                           |
| Fatty acid alcohol         | Omega-6                                                   | 15-HEPE               | 15-hydroxyeicosa-5,8,11,13,17-pentaenoic acid      | 454 (98%)                                           |
| Fatty acid alcohol         | Omega-6                                                   | 9-HODE                | 9-Hydroxylinoleic acid                             | 463 (100%)                                          |
| Fatty acid alcohol         | Omega-6                                                   | 5-HETE                | 5-Hydroxy-6,8,11,14-eicosatetraenoic acid          | 460 (99%)                                           |
| Fatty acid alcohol         | Omega-6                                                   | 12S-HETE              | 12-Hydroxy-5,8,10,14-eicosatetraenoic acid         | 461 (100%)                                          |
| Fatty acid alcohol         | Omega-3                                                   | 13-HOTE               | 13-hydroxyoctadeca-9,11,15-trienoic acid           | 460 (99%)                                           |
| Fatty acid alcohol         | Omega-6                                                   | 13S-HODE              | 13-Hydroxyoctadecadienoic acid                     | 463 (100%)                                          |
| Fatty acid alcohol         | Omega-3                                                   | 17-HDoHE              | 17-hydroxy-4,7,10,13,15,19-docosahexaenoic acid    | 460 (99%)                                           |
| Fatty acid alcohol         | Omega-3                                                   | 9-HOTE                | 9-hydroxyoctadeca-10,12,15-trienoic acid           | 463 (100%)                                          |
| Fatty acid diol            | Omega-6                                                   | 5,6-DiHETrE           | 5,6-dihydroxyeicosa-8,11,14-trienoic acid          | 460 (99%)                                           |
| Fatty acid diol            | Omega-6                                                   | 6-trans-LTB4          | 6-trans-Leukotriene B4                             | 382 (83%)                                           |
| Fatty acid diol            | Omega-6                                                   | 14,15-DiHETrE         | 14,15-dihydroxyeicosa-5,8,11-trienoic acid         | 460 (99%)                                           |
| Fatty acid diol            | Omega-6                                                   | 12,13-DiHOME          | 12,13-dihydroxyoctadec-9-enoic acid                | 463 (100%)                                          |
| Fatty acid diol            | Omega-3                                                   | 15,16-DiHODE          | 15,16-dihydroxyoctadeca-9,12-dienoic acid          | 460 (99%)                                           |
| Fatty acid diol            | Omega-6                                                   | 9,10-DiHOME           | 9,10-dihydroxyoctadec-12-enoic acid                | 461 (100%)                                          |
| Fatty acid diol            | Omega-6                                                   | 11,12-DiHETrE         | 11,12-Dihydroxyeicosa-5,8,14-trienoic acid         | 460 (99%)                                           |
| Fatty acid diol            | Omega-3                                                   | 17,18-DiHETE          | 17,18-dihydroxyeicosa-5,8,11,14-tetraenoic acid    | 460 (99%)                                           |
| Fatty acid diol            | -----                                                     | 9,10-e-DiHO           | 9S,10R-dihydroxy-stearic acid                      | 463 (100%)                                          |
| Fatty acid diol            | Omega-6                                                   | 8,9-DiHETrE           | 8,9-dihydroxyeicosa-5,11,14-trienoic acid          | 457 (99%)                                           |
| Fatty acid diol            | Omega-3                                                   | 19,20-DiHDPE          | 19,20-dihydroxydocosa-4,7,10,13,16-pentaenoic acid | 460 (99%)                                           |
| Fatty acid diol            | Omega-3                                                   | 14,15-DiHETE          | 14,15-dihydroxyeicosa-5,8,11,17-tetraenoic acid    | 405 (87%)                                           |
| Fatty acid diol            | Omega-3                                                   | 9,10-DiHODE           | 9,10-dihydroxyoctadeca-12,15-dienoic acid          | 441 (95%)                                           |
| Fatty acid epoxide         | Omega-6                                                   | 9(10)-EpOME           | 9(10)-epoxy-12Z-octadecenoic acid                  | 461 (100%)                                          |
| Fatty acid epoxide         | Omega-3                                                   | 15,16-EpODE           | 15(16)-epoxy-9,12-octadecadienoic acid             | 452 (98%)                                           |
| Fatty acid epoxide         | Omega-6                                                   | 11,12-EpETrE          | 11,12-Epoxyeicosa-5,8,14-trienoic acid             | 439 (95%)                                           |
| Fatty acid epoxide         | Omega-6                                                   | 14,15-EpETrE          | 11-Hydroxy-14,15-epoxyeicosatrienoic acid          | 419 (90%)                                           |
| Fatty acid epoxide         | Omega-3                                                   | alpha-9(10)-EpODE     | 9(10)-epoxy-12,15-octadecadienoic acid             | 415 (90%)                                           |
| Fatty acid epoxide         | Omega-6                                                   | 12(13)-EpOME          | 12,13-epoxy-9-octadecenoic acid                    | 459 (99%)                                           |
| Fatty acid epoxide         | Omega-3                                                   | alpha-12(13)-EpODE    | 12(13)-epoxy-9,15-octadecadienoic acid             | 444 (96%)                                           |
| Fatty acid epoxide         | -----                                                     | 9,10-EpO              | 9,10-Epoxy-stearic acid                            | 454 (98%)                                           |
| Fatty acid ketone          | Omega-3                                                   | 5-KETE                | 5-ketoeicosa-6,8,11,14-tetraenoic acid             | 392 (85%)                                           |
| Fatty acid ketone          | Omega-6                                                   | 9-KODE                | 9-ketooctadeca-10,12-dienoic acid                  | 461 (100%)                                          |
| Fatty acid ketone          | Omega-6                                                   | 13-KODE               | 13-ketooctadeca-9,11-dienoic acid                  | 456 (98%)                                           |
| Fatty acid triol           | Omega-6                                                   | 9,12,13-TriHOME       | 9,12,13-trihydroxyoctadec-10-enoic acid            | 461 (100%)                                          |
| Nitro-fatty acid           | Omega-9                                                   | 10-Nitrooleate        | 10-nitrooleic acid                                 | 373 (81%)                                           |

Table S3a. Attenuation in associations between select oxylipins and gait speed after additionally adjusting for D3-creatine muscle mass/weight among 463 MrOs Men

|                                       | <b>Model 1*:</b><br>Association between<br>oxylipins or D3-creatine<br>muscle mass/weight<br>with respect to gait speed | <b>Model 2*:</b><br>Association between<br>oxylipins and D3-creatine<br>muscle mass/weight | <b>Model 3**:</b><br>Associations between oxylipins or D3-creatine muscle mass/weight with respect to gait speed,<br>while further adjusting for oxylipin and D3-creatine muscle mass/weight in the same model |                     |                                                               |                     |
|---------------------------------------|-------------------------------------------------------------------------------------------------------------------------|--------------------------------------------------------------------------------------------|----------------------------------------------------------------------------------------------------------------------------------------------------------------------------------------------------------------|---------------------|---------------------------------------------------------------|---------------------|
|                                       | Standardized<br>beta coefficient<br>(standard error), p-value                                                           | Standardized<br>beta coefficient<br>(standard error), p-value                              | Oxylipin                                                                                                                                                                                                       |                     | D3-creatine muscle mass/weight                                |                     |
|                                       |                                                                                                                         |                                                                                            | Standardized<br>beta coefficient<br>(standard error), p-value                                                                                                                                                  | Attenuation<br>**** | Standardized<br>beta coefficient<br>(standard error), p-value | Attenuation<br>**** |
| <b>D3-creatine Muscle Mass/weight</b> | -0.30 (0.10), p=0.003                                                                                                   | -----                                                                                      | -----                                                                                                                                                                                                          |                     |                                                               |                     |
| <b>Oxylipins***:</b>                  |                                                                                                                         |                                                                                            |                                                                                                                                                                                                                |                     |                                                               |                     |
| Fatty acid alcohol:                   |                                                                                                                         |                                                                                            |                                                                                                                                                                                                                |                     |                                                               |                     |
| 14-HDoHE                              | 0.14 (0.04), p=0.002                                                                                                    | 0.14 (0.04), p=0.002                                                                       | 0.10 (0.04), p=0.02                                                                                                                                                                                            | 28%                 | 0.28 (0.04), p<0.0001                                         | 5%                  |
| 4-HDoHE                               | 0.14 (0.04), p=0.001                                                                                                    | 0.13 (0.04), p=0.003                                                                       | 0.10 (0.04), p=0.01                                                                                                                                                                                            | 26%                 | 0.28 (0.04), p<0.0001                                         | 5%                  |
| 12S-HEPE                              | 0.11 (0.04), p=0.01                                                                                                     | 0.10 (0.04), p=0.03                                                                        | 0.08 (0.04), p=0.05                                                                                                                                                                                            | 25%                 | 0.28 (0.04), p<0.0001                                         | 3%                  |
| 15-HETE                               | 0.13 (0.04), p=0.003                                                                                                    | 0.07 (0.04), p=0.11                                                                        | -----                                                                                                                                                                                                          | -----               | -----                                                         | -----               |
| 8S-HETE                               | 0.12 (0.04), p=0.005                                                                                                    | 0.09 (0.04), p=0.04                                                                        | 0.09 (0.04), p=0.02                                                                                                                                                                                            | 22%                 | 0.28 (0.04), p<0.0001                                         | 3%                  |
| 11-HETE                               | 0.11 (0.04), p=0.009                                                                                                    | 0.10 (0.04), p=0.02                                                                        | 0.08 (0.04), p=0.04                                                                                                                                                                                            | 25%                 | 0.28 (0.04), p<0.0001                                         | 3%                  |
| 9-HETE                                | 0.10 (0.04), p=0.02                                                                                                     | 0.09 (0.04), p=0.04                                                                        | 0.08 (0.04), p=0.06                                                                                                                                                                                            | 24%                 | 0.28 (0.04), p<0.0001                                         | 3%                  |
| 9-HEPE                                | 0.09 (0.04), p=0.04                                                                                                     | 0.12 (0.04), p=0.005                                                                       | 0.05 (0.04), p=0.20                                                                                                                                                                                            | 40%                 | 0.29 (0.04), p<0.0001                                         | 3%                  |
| 5-HETE                                | 0.09 (0.04), p=0.03                                                                                                     | 0.07 (0.04), p=0.11                                                                        | -----                                                                                                                                                                                                          | -----               | -----                                                         | -----               |
| Fatty acid diol:                      |                                                                                                                         |                                                                                            |                                                                                                                                                                                                                |                     |                                                               |                     |
| 5,6-DiHETrE                           | 0.12 (0.04), p=0.004                                                                                                    | 0.10 (0.04), p=0.03                                                                        | 0.10 (0.04), p=0.02                                                                                                                                                                                            | 22%                 | 0.28 (0.04), p<0.0001                                         | 4%                  |
| 6-trans-LTB4                          | 0.11 (0.04), p=0.01                                                                                                     | 0.07 (0.04), p=0.10                                                                        | -----                                                                                                                                                                                                          | -----               | -----                                                         | -----               |
| 14,15-DiHETrE                         | -0.10 (0.04), p=0.02                                                                                                    | -0.06 (0.04), p=0.17                                                                       | -----                                                                                                                                                                                                          | -----               | -----                                                         | -----               |
| 12,13-DiHOME                          | -0.09 (0.04), p=0.03                                                                                                    | -0.002 (0.04), p=0.97                                                                      | -----                                                                                                                                                                                                          | -----               | -----                                                         | -----               |
| 9,10-DiHOME                           | -0.09 (0.04), p=0.03                                                                                                    | 0.06 (0.04), p=0.16                                                                        | -----                                                                                                                                                                                                          | -----               | -----                                                         | -----               |
| Fatty acid ketone:                    |                                                                                                                         |                                                                                            |                                                                                                                                                                                                                |                     |                                                               |                     |
| 5-KETE                                | 0.12 (0.04), p=0.007                                                                                                    | 0.10 (0.04), p=0.02                                                                        | 0.09 (0.04), p=0.04                                                                                                                                                                                            | 25%                 | 0.28 (0.04), p<0.0001                                         | 3%                  |
| 9-KODE                                | 0.10 (0.04), p=0.02                                                                                                     | 0.13 (0.04), p=0.003                                                                       | 0.07 (0.04), p=0.10                                                                                                                                                                                            | 35%                 | 0.28 (0.04), p<0.0001                                         | 3%                  |
| 13-KODE                               | 0.09 (0.04), p=0.03                                                                                                     | 0.10 (0.04), p=0.02                                                                        | 0.06 (0.04), p=0.13                                                                                                                                                                                            | 32%                 | 0.29 (0.04), p<0.0001                                         | 2%                  |

\*Models 1 & 2: Adjusted for age, more than high school education, Physical Activity Scale for the Elderly, western style dietary pattern score, and fish oil supplement use.

\*\*Model 3: Adjusted for D3-creatine muscle mass/weight and an oxylipin in the same model, in addition to age, more than high school education, Physical Activity Scale for the Elderly, and western style dietary pattern score.

\*\*\*Select oxylipins included are the subset that were associated with gait speed at a p<0.05.

Note, all continuous variables were standardized to a mean of zero and standard deviation of one.

\*\*\*\*Attenuation=100\*(beta coefficient from initial model – beta coefficient from further adjusted model) / beta coefficient from initial model).

Table S3b. Attenuation in associations between select oxylipins and short physical performance battery (SPPB) after additionally adjusting for D3-creatine muscle mass/weight among 463 MrOs Men

|                                       | <b>Model 1*:</b><br>Association between oxylipins or D3-creatine muscle mass/weight with respect to SPPB | <b>Model 2*:</b><br>Association between oxylipins and D3-creatine muscle mass/weight | <b>Model 3**:</b><br>Associations between oxylipins or D3-creatine muscle mass/weight with respect to SPPB, while further adjusting for oxylipin and D3-creatine muscle mass/weight in the same model |                     |                                                            |                     |
|---------------------------------------|----------------------------------------------------------------------------------------------------------|--------------------------------------------------------------------------------------|-------------------------------------------------------------------------------------------------------------------------------------------------------------------------------------------------------|---------------------|------------------------------------------------------------|---------------------|
|                                       | Standardized beta coefficient<br>(standard error), p-value                                               | Standardized beta coefficient<br>(standard error), p-value                           | Oxylipin                                                                                                                                                                                              |                     | D3-creatine muscle mass/weight                             |                     |
|                                       |                                                                                                          |                                                                                      | Standardized beta coefficient<br>(standard error), p-value                                                                                                                                            | Attenuation<br>**** | Standardized beta coefficient<br>(standard error), p-value | Attenuation<br>**** |
| <b>D3-creatine Muscle Mass/weight</b> | 0.33 (0.04), p<0.0001                                                                                    | -----                                                                                | -----                                                                                                                                                                                                 |                     |                                                            |                     |
| <b>Oxylipins***:</b>                  |                                                                                                          |                                                                                      |                                                                                                                                                                                                       |                     |                                                            |                     |
| Fatty acid alcohol:                   |                                                                                                          |                                                                                      |                                                                                                                                                                                                       |                     |                                                            |                     |
| 13-HOTE                               | 0.14 (0.04), p=0.001                                                                                     | 0.12 (0.04) p=0.006                                                                  | 0.10 (0.04) p=0.02                                                                                                                                                                                    | 28%                 | 0.31 (0.04) p<0.0001                                       | 4%                  |
| 13S-HODE                              | 0.12 (0.04), p=0.007                                                                                     | 0.12 (0.04) p=0.006                                                                  | 0.08 (0.04) p=0.06                                                                                                                                                                                    | 33%                 | 0.32 (0.04) p<0.0001                                       | 3%                  |
| Fatty acid ketone:                    |                                                                                                          |                                                                                      |                                                                                                                                                                                                       |                     |                                                            |                     |
| 9-KODE                                | 0.14 (0.04), p=0.001                                                                                     | 0.13 (0.04) p=0.003                                                                  | 0.10 (0.04) p=0.02                                                                                                                                                                                    | 29%                 | 0.31 (0.04) p<0.0001                                       | 4%                  |

\*Models 1 & 2: Adjusted for age, more than high school education, Physical Activity Scale for the Elderly score, western style dietary pattern score, and fish oil supplement use.

\*\*Model 3: Adjusted for D3-creatine muscle mass/weight and an oxylipin in the same model, in addition to age, more than high school education, Physical Activity Scale for the Elderly, and western style dietary pattern score.

\*\*\*Select oxylipins included are the subset that were associated with SPPB at a p<0.05.

Note, all continuous variables were standardized to a mean of zero and standard deviation of one.

\*\*\*\*Attenuation=100\*(beta coefficient from initial model – beta coefficient from further adjusted model) / beta coefficient from initial model).

Table S4. Fatty acid classification, abbreviation, and full name of the 34 oxylipins excluded from this report because they were detected in less than 80% of the cohort

| Fatty acid classification: | Oxylipin abbreviation | Oxylipin                                                     | Number (%) of participants oxylipin was detected in |
|----------------------------|-----------------------|--------------------------------------------------------------|-----------------------------------------------------|
| Fatty acid alcohol         | 5S-HEPE               | 5-Hydroxy-6,8,11,14,17-eicosapentaenoic acid                 | 347 (75%)                                           |
| Fatty acid alcohol         | 20-HETE               | 20-Hydroxyarachidonic acid                                   | 152 (33%)                                           |
| Fatty acid diol            | LTB4                  | Leukotriene B4                                               | 325 (70%)                                           |
| Fatty acid diol            | 5S,15R-diHETE         | 5,15-dihydroxyeicosa-6,8,11,13-tetraenoic acid               | 290 (63%)                                           |
| Fatty acid diol            | 8,15-DiHETE           | 8,15-dihydroxyeicosa-5,9,11,13-tetraenoic acid               | 271 (59%)                                           |
| Fatty acid diol            | LTB5                  | Leukotriene B5                                               | 105 (23%)                                           |
| Fatty acid diol            | 12,13-DiHODE          | 12,13-dihydroxyoctadeca-9,15-dienoic acid                    | 70 (15%)                                            |
| Fatty acid epoxide         | 12(13)Ep-9-KODE       | trans-12,13-epoxy-11-oxo-trans-9-octadecenoic acid           | 330 (71%)                                           |
| Fatty acid epoxide         | 17(18)-EpETE          | 17,18-Epoxy-5,8,11,14-eicosatetraenoic acid                  | 309 (67%)                                           |
| Fatty acid epoxide         | 11(12)-EpETE          | 11(12)-epoxy-5,8,14,17- eicosatetraenoic acid                | 247 (53%)                                           |
| Fatty acid epoxide         | 19(20)-EpDPE          | 18-(3-ethyloxiran-2-yl)octadeca-4,7,10,13,16-pentaenoic acid | 199 (43%)                                           |
| Fatty acid epoxide         | 8(9)-EpETRE           | 8,9-Epoxyeicosa-5,11,14-trienoic acid                        | 190 (41%)                                           |
| Fatty acid epoxide         | 14(15)-EpETE          | 14(15)-epoxy-5,8,11,17-eicosatetraenoic acid                 | 131 (28%)                                           |
| Fatty acid epoxide         | 16(17)-EpDPE          | 16(17)-epoxy-4,7,10,13,19-docosapentaenoic acid              | 59 (13%)                                            |
| Fatty acid ketone          | 15-KETE               | 15-ketoeicosa-5,8,11,13-tetraenoic acid                      | 273 (59%)                                           |
| Fatty acid triol           | PGF3alpha             | 9,11,15-trihydroxy-5,13,1Z-prostatienoic acid                | 104 (22%)                                           |
| Fatty acid triol           | Lipoxin A4            | 5,6,15-trihydroxyeicosa-7,9,11,13-tetraenoic acid            | 0                                                   |
| Fatty acid triol           | Resolvin D1           | Resolvin D1                                                  | 0                                                   |
| Nitro-fatty acid           | 10-Nitrolinoleate     | 10-nitrolinoleic acid                                        | 66 (14%)                                            |
| Nitro-fatty acid           | 9-Nitrooleate         | 9-nitrooleic acid                                            | 40 (9%)                                             |
| Prostanoid                 | PGF2alpha             | Prostaglandin F2a                                            | 243 (52%)                                           |
| Prostanoid                 | PGE2                  | Prostaglandin E2                                             | 162 (35%)                                           |
| Prostanoid                 | PGD2                  | Prostaglandin D2                                             | 160 (35%)                                           |
| Prostanoid                 | PGE3                  | Prostaglandin E3                                             | 101 (22%)                                           |
| Prostanoid                 | PGE1                  | Prostaglandin E1                                             | 73 (16%)                                            |
| Prostanoid                 | 15-deoxy PGJ2         | 15-Deoxy-delta-12,14-Prostaglandin J2                        | 34 (7%)                                             |
| Prostanoid                 | 15-Keto PGE2          | 15-Keto-prostaglandin E2                                     | 14 (3%)                                             |
| Prostanoid                 | 6-keto-PGF1alpha      | 6-Ketoprostaglandin F1 alpha                                 | 0                                                   |
| Thromboid                  | TXB2                  | Thromboxane B2                                               | 322 (70%)                                           |
| Fatty acid hydroperoxide   | 12-HpETE              | 12-hydroperoxyeicosa-5,8,10,14-tetraenoic acid               | 0                                                   |
| Fatty acid hydroperoxide   | 13-HpODE              | 13-hydroperoxyoctadeca-9,11-dienoic acid                     | 0                                                   |
| Fatty acid hydroperoxide   | 15-HpETE              | 15-hydroperoxyeicosa-5,8,11,13-tetraenoic acid               | 0                                                   |
| Fatty acid hydroperoxide   | 5-HpETE               | 5-hydroperoxyeicosa-6,8,11,14-tetraenoic acid                | 0                                                   |
| Fatty acid hydroperoxide   | 9-HpODE               | 9-hydroperoxyoctadeca-10,12-dienoic acid                     | 0                                                   |
